# Supplementary material for: In Vitro Sensitivity of Neuroendocrine Neoplasms to an Armed Oncolytic Measles Vaccine Virus
Source: MDPI journal article supplement (doi:10.3390/cancers16030488), 2024-01-23
Supplement: s1 [file s1]

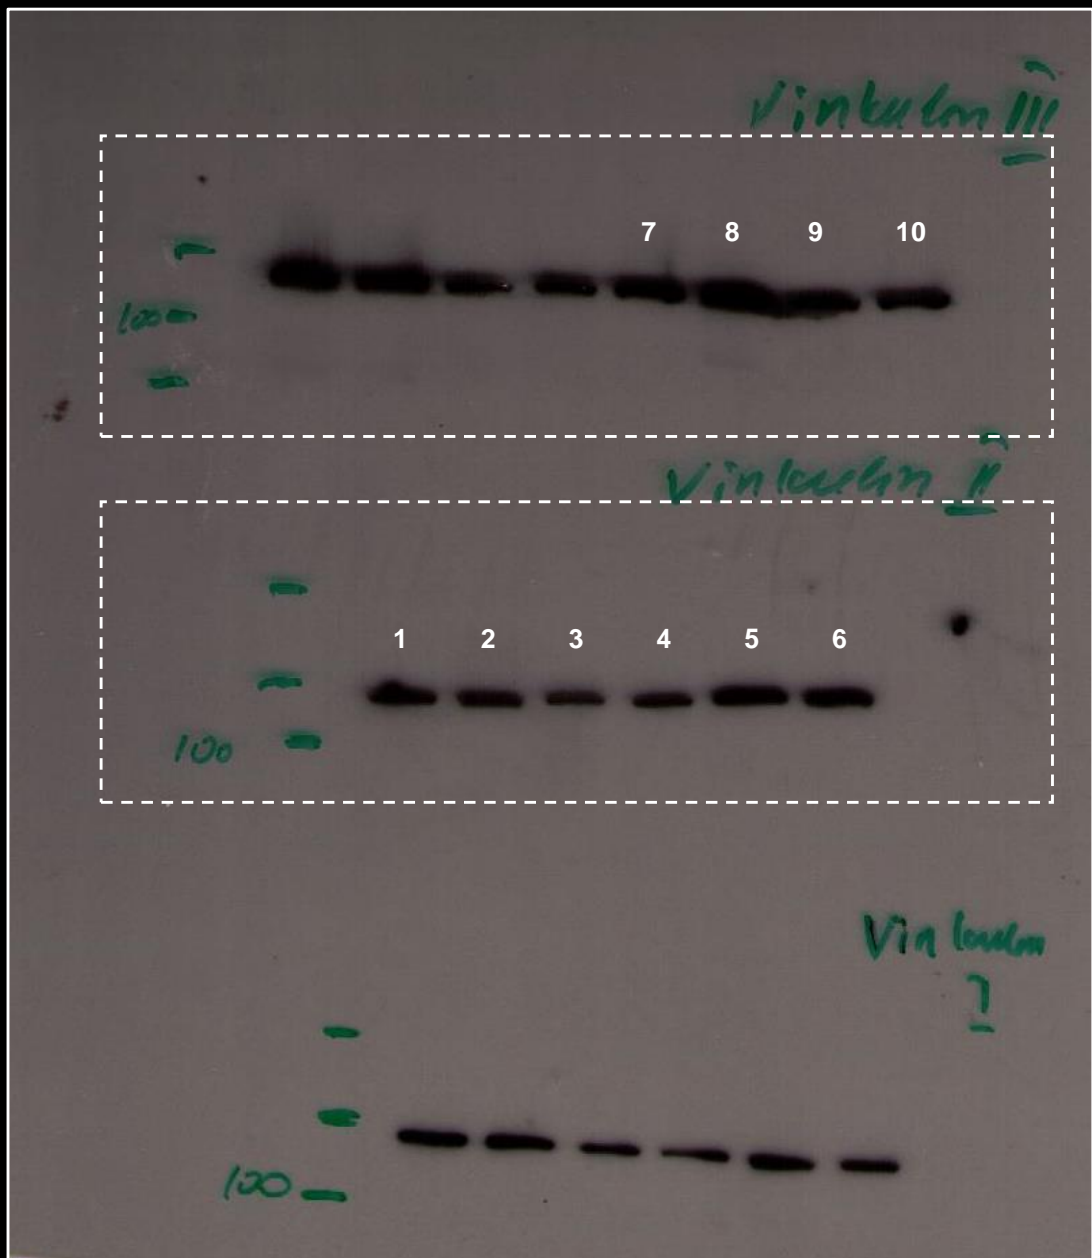

#### Vinculin bands

- 1 – HROC57 MOCK
- 2 – HROC57 MeV-SCD MOI 0.075
- 3 – UMC-11 MOCK
- 4 – UMC-11 MeV-SCD MOI 0.5
- 5 – QGP-1 MOCK
- 6 – QGP-1 MeV-SCD MOI 1
- 7 – BON1 MOCK
- 8 – BON1 MeV-SCD MOI 0.075
- 9 – H727 MOCK
- 10 – H727 MeV-SCD MOI 0.75

**Figure S1. Raw data derived from immunoblot analysis of Vinculin in human NET/NEC tumor cell lines.**
