# Supplementary material for: In Vitro Sensitivity of Neuroendocrine Neoplasms to an Armed Oncolytic Measles Vaccine Virus
Source: MDPI journal article supplement (doi:10.3390/cancers16030488), 2024-01-23
Supplement: s1 [file s1]

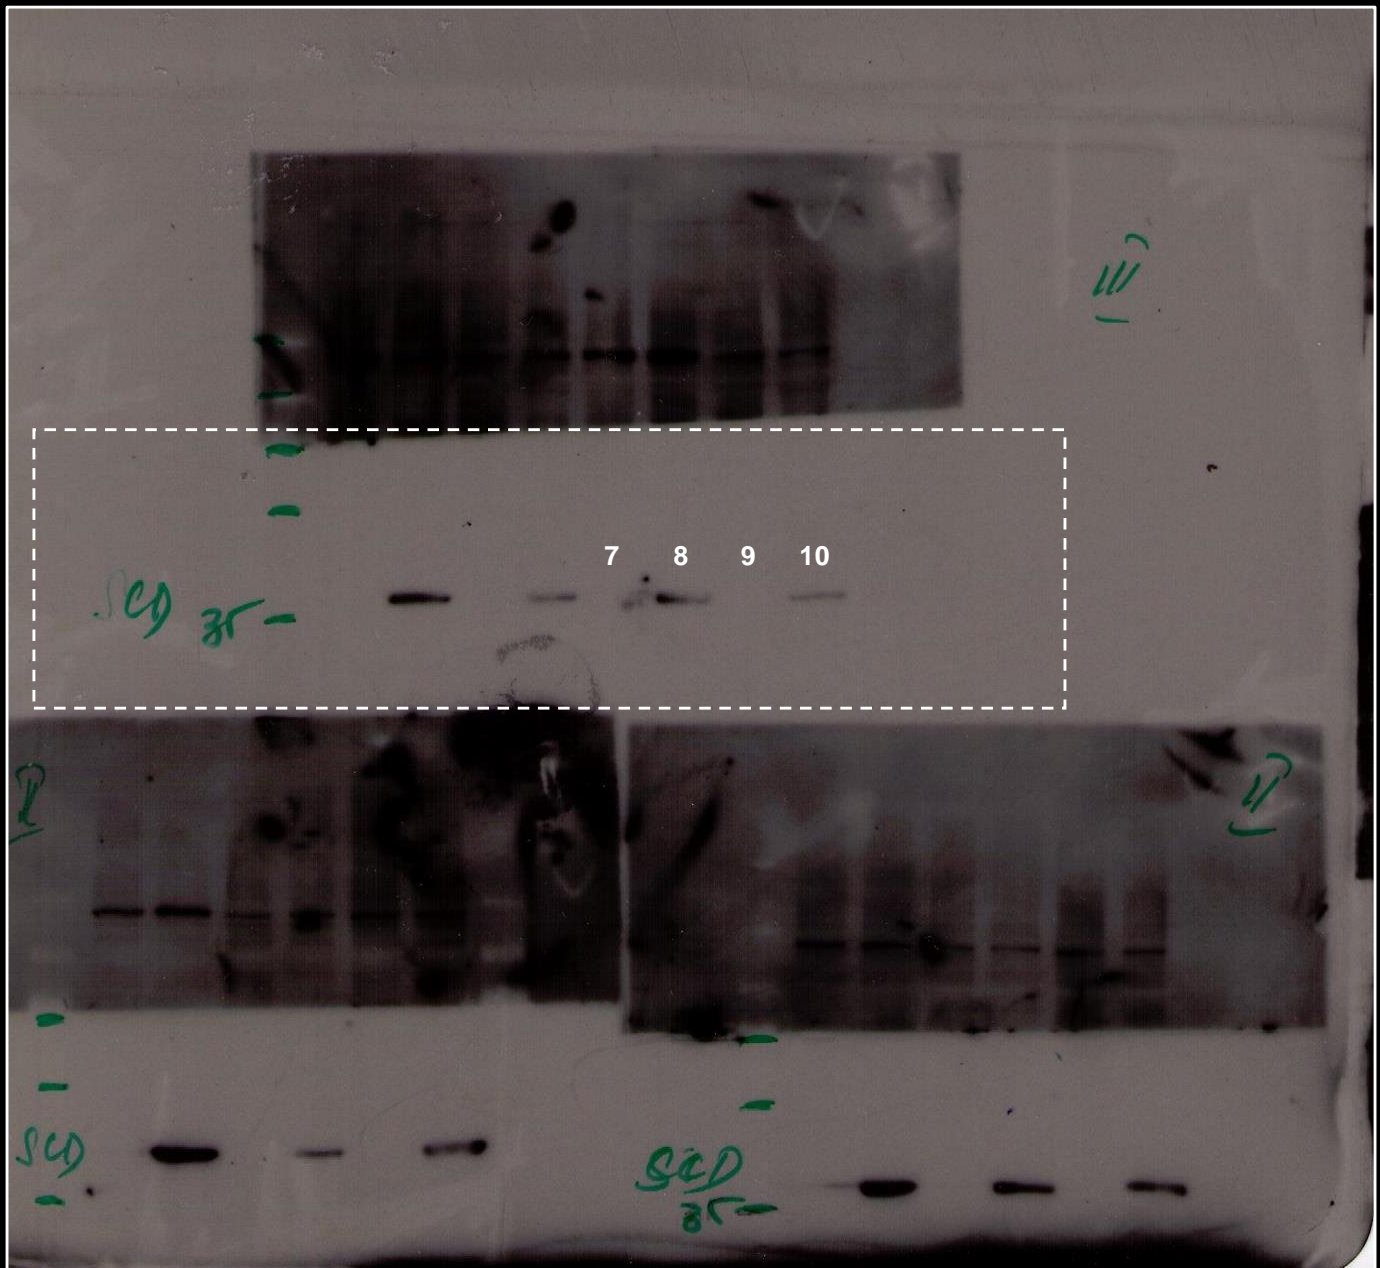

SCD bands

7 – BON1 MOCK

8 – BON1 MeV-SCD MOI 0.075

9 – H727 MOCK

10 – H727 MeV-SCD MOI 0.75

**Figure S3.** Raw data derived from immunoblot analysis of MeV-encoded SCD protein expression in human NET/NEC tumor cell lines BON1 and H727.
