# Supplementary material for: In Vitro Sensitivity of Neuroendocrine Neoplasms to an Armed Oncolytic Measles Vaccine Virus
Source: MDPI journal article supplement (doi:10.3390/cancers16030488), 2024-01-23
Supplement: s1 [file s1]

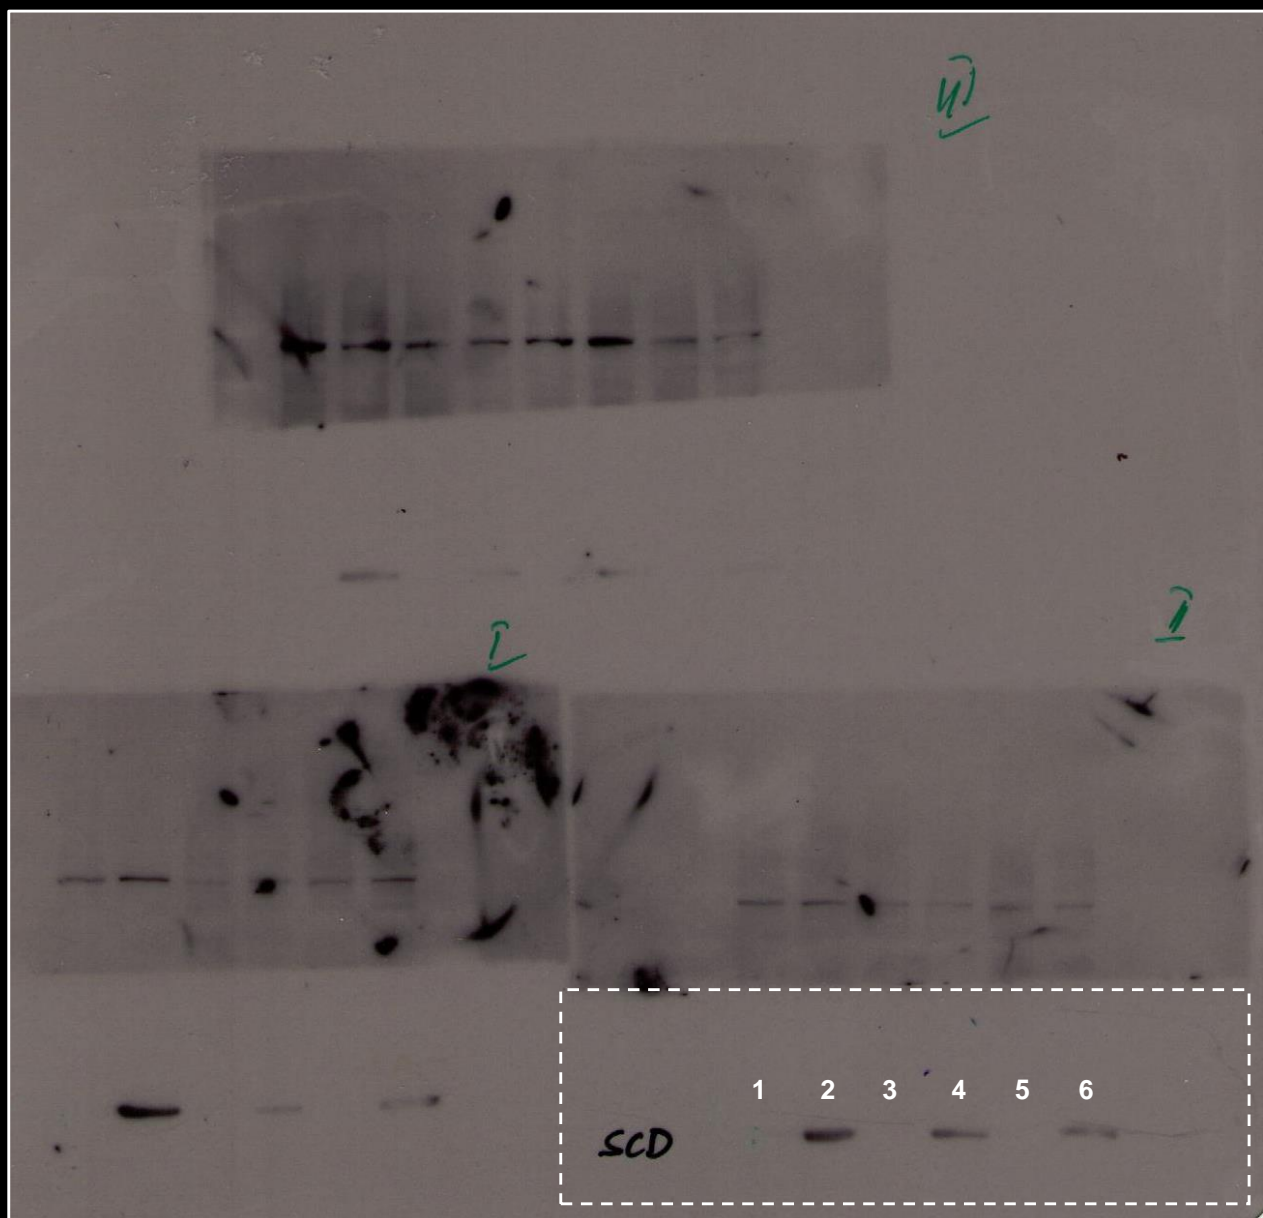

#### SCD bands

- 1 – HROC57 MOCK
- 2 – HROC57 MeV-SCD MOI 0.075
- 3 – UMC-11 MOCK
- 4 – UMC-11 MeV-SCD MOI 0.5
- 5 – QGP-1 MOCK
- 6 – QGP-1 MeV-SCD MOI 1

**Figure S2. Raw data derived from immunoblot analysis of MeV-encoded SCD protein expression in human NET/NEC tumor cell lines HROC57, UMC-11 and QGP-1.**
